# Supplementary material
Source: publisher site journal article supplement (https://www.dovepress.com/article/562419)
Supplement: Supplementary file 1 [file 562419_Supplements_1_1.doc]

Supplementary material 1:

Semi-Structured Interview Questionnaire Guide

Code: Location: Date:

Gender: Starting Time: Ending Time:

*For the interviewer: Please go over all terms in the information and consent form with the participant and make sure everything is well understood.*

Thank you for agreeing to take part in this project. Our aim is to explore the views, experiences and suggestions of medical staff on the implementation status, existing problems, promotion and hindrance factors of pre- and post-operative rehabilitation exercise in geriatric patients with femoral neck fractures (FNFs), in order to continuously optimize the exercise program and accelerate the rehabilitation process of patients. During this interview, I’ll ask you about the sources of information you use, how you get that information and how you decide if it’s reliable or not.

The information you share during this interview will be kept private. I’ve signed a confidentiality agreement, as has every member of the research team. And when we share the results, your identity won’t be revealed.

Feel free to speak openly. There are no right or wrong answers and you don’t have to answer every question. If you feel uncomfortable at any point, we can stop the interview.

Do you have any questions before we start?

*Once the consent form has been signed and the participant has agreed to the interview being recorded, start the recording. Or if it is oral consent, start recording and ask the informed consent question.*

**Opening questions / General information**

1. Basic information questions: How old are you? Which department are you in? What is your professional title? How many years have you worked in your current position? What is your educational background?

2. For you personally, do you think exercise rehabilitation is important? (Whether the answer is important or not, please specify the reasons.)

**Experience sources**

3. Do you have experience in guiding geriatric patients with FNFs to perform exercise rehabilitation after total hip arthroplasty (THA)?

4. Can you describe in detail your most memorable guidance experience?

5. Based on your clinical work experience, how do you think the geriatric patients with FNFs should perform exercise rehabilitation?

6. How do you guide patients to perform exercise rehabilitation in their daily work?

7. What problems have you encountered in the guidance process and how did you solve them?

**Influencing factors**

8. What do you consider the most important aspect in guiding geriatric patients with FNFs to perform exercise rehabilitation before and after THA?

9. What do you do when a patient refuses to perform exercise rehabilitation?

10. What kind of environment do you think can promote patients' exercise rehabilitation?

11. Based on your experience, what factors do you think will affect the patients' compliance with exercise rehabilitation? (Please give an example.)

**Multidisciplinary teamwork**

12. As a member of a multidisciplinary team, what are your main responsibilities and obligations? Do you know the responsibilities and obligations of other team members?

13. How do you think your role plays a part in the multidisciplinary team?

14. What factors do you think will affect communication and cooperation among multidisciplinary team members? How to communicate and cooperate more effectively?

15. Are there any other improvement suggestions？

**Individualized management**

1. How do you adjust rehabilitation protocols based on patients' individual differences such as age, comorbidities, and cognitive function? Could you provide specific examples?

17. How do you assess and manage patients' pain during the exercise rehabilitation process? How does pain affect patients' rehabilitation compliance?

18. What role do you think patients' family members should play in the exercise rehabilitation process? How do you train and guide family members to assist patients with rehabilitation?

**Continuity of care**

1. How do you conduct rehabilitation follow-up for patients after discharge? What are the deficiencies in the current follow-up mechanisms?
2. What role do you think community healthcare institutions should play in the rehabilitation of geriatric patients with FNFs? What problems exist in the current hospital-community coordination?
3. Do you think you have received adequate professional training in guiding rehabilitation for geriatric patients with FNFs? What aspects of training support are needed?

**Suggestions for development**

1. Generally speaking, what is your view on the current status of exercise rehabilitation for geriatric patients with FNFs in China before and after THA?

23. Do you think the current medical policies and treatment environment are conducive to the development of the China's rehabilitation industry?

24. What opinions and suggestions do you have on the exercise rehabilitation for geriatric patients with FNFs?

25. Is there anything else you would like to mention that we haven’t talked about?

**Conclusion**

At this point, revisit ambiguous or unclear answers and try to summarize the main elements of the interviews. Thank you!
